# Supplementary material
Source: publisher figshare collection journal article supplement (https://acs.figshare.com/ndownloader/files/9475003)
Supplement: Supplementary file 1 [file 9475003]

## Supporting Information

### Hydrogen Liberation from Gaseous 2-Bora-1,3-diazacycloalkanium Cations

Jay-Ar Bendo,<sup>a</sup> Jonathan Martens,<sup>b</sup> Giel Berden,<sup>b</sup> Jos Oomens,<sup>b,c</sup> and Thomas Hellman Morton<sup>a,d</sup>

<sup>a</sup> Department of Chemistry, University of California, Riverside, CA, 92521, USA; <sup>b</sup> Radboud University, Institute for Molecules and Materials, FELIX Laboratory, Toernooiveld 7c, NL-6525ED, Nijmegen, The Netherlands; <sup>c</sup> van't Hoff Institute for Molecular Sciences, University of Amsterdam, Science Park 904, NL-1098XH Amsterdam, The Netherlands; <sup>d</sup> Laboratoire de Pharmacognosie – UMR BIOCIS, Université Paris-Saclay, 5, rue Jean-Baptiste Clément, 92296 Châtenay-Malabry, France

**Figure S-1.** Comparison of the IR absorption spectrum recorded for solid **4** ( $n=1$ ) (upper panel) compared with the absorptions predicted by an anharmonic frequency calculation<sup>a</sup> on the isolated molecule (lower panel) at B3LYP/aug-cc-pVTZ (using harmonic intensities with unscaled anharmonic frequencies).

**Figure S-2.** Collisionally Activated Dissociation (CAD) MS/MS spectrum of tetradeuterated ion **9** at 10V lab frame energy. The parent ion,  $m/z$  77, gives  $m/z$  74 (loss of HD) and  $m/z$  57 (loss of ND<sub>3</sub>).

**Figure S-3.** CAD MS/MS spectra of ion **4** at 10V lab frame energy, which shows the parent ion at  $m/z$  87 and produces ions at  $m/z$  85 (loss of H<sub>2</sub>),  $m/z$  70 (loss of ammonia), and  $m/z$  68 (loss of H<sub>2</sub> and ammonia). Inset: CAD of ion **10** at 10V, which shows a parent ion at  $m/z$  91 and daughter ions  $m/z$  89 (loss of HD), a much smaller  $m/z$  88 (loss of H<sub>2</sub>),  $m/z$  71 (loss of ND<sub>3</sub>), and  $m/z$  69 (loss of H<sub>2</sub> and ND<sub>3</sub> or of HD and NHD<sub>2</sub>).

**Figure S-4.** CAD MS/MS spectra of ion **5** at 10V lab frame energy which shows the parent ion  $m/z$  101 which produces  $m/z$  99 (loss of H<sub>2</sub>),  $m/z$  84 (loss of ammonia), and lower mass ions. Inset: a CAD of ion **11** at 10V, which shows a parent ion at  $m/z$  105 and daughter ions  $m/z$  102 (loss of HD) and  $m/z$  103 (loss of H<sub>2</sub>),  $m/z$  85 (loss of ND<sub>3</sub>), and  $m/z$  86 (loss of NHD<sub>2</sub>).

**Figure S-5.** CAD MS/MS spectra of ion **6** at 10 V lab frame energy which shows the parent ion  $m/z$  115 and daughter ions  $m/z$  113 (loss of H<sub>2</sub>),  $m/z$  98 (loss of ammonia),  $m/z$  96 (loss of H<sub>2</sub> and ammonia), and other daughter ions.

**Figure S-6.** CAD MS/MS spectra of ion **17** ( $m/z$  157) and its  $d_4$  analogue ( $m/z$  161 from exchange with EtOD solvent) at 10V lab frame energy with argon collision gas.

**Figure S-7.** CAD spectra of ion **18** and its isotopomers (left inset a <sup>10</sup>B & two <sup>11</sup>Bs at natural abundance; right inset the  $d_4$  analogue from exchange in EtOD) at 10V lab frame energy with argon collision gas.

**Figure S-8.** Experimental IRMPD spectra (blue silhouette) vs. harmonic calculated normal modes (solid red line, scaled by 0.97 with 30 cm<sup>-1</sup> Gaussian line broadening)<sup>a</sup> of **11**: without scrambling of the protons in the NBN branch (top) and shows a good fit except for a mismatch of peaks in the 1750 to 1950 cm<sup>-1</sup> region; with scrambling of the protons in the NBN branch (middle) which shows a matching peak in the 1750 to 1950 cm<sup>-1</sup> region but a poor fit for the rest; and a branched isomer which was found to be more stable than the two cyclic isomers on top(bottom) but shows a poor fit to the experimental peaks.

**Figure S-9.** Experimental IRMPD spectrum (blue silhouette) vs. harmonic calculated normal mode (solid red line, scaled by 0.97 with 30 cm<sup>-1</sup> Gaussian line broadening)<sup>a</sup> of **8**: without scrambling of the protons in the NBN branch (top), which shows a good fit to experimental band positions; with scrambling of the protons in the NBN branch (middle) which shows a poor fit compared to the unscrambled isomer; and a branched isomer which was found to be more stable than the two cyclic isomers on top (bottom) but also shows a poor fit to the experimental bands.

**Figure S-10.** A comparison of harmonic normal modes (solid red line, unscaled with 30 cm<sup>-1</sup> Gaussian line broadening) and anharmonic vibrations (blue silhouette, unscaled using harmonic intensities and 30

$\text{cm}^{-1}$  gaussian line broadening)<sup>a</sup> calculated for **11**, which shows the same peaks positions below  $800\text{ cm}^{-1}$  with a shift of about 3% in the wavenumbers above  $800\text{ cm}^{-1}$ .

**Figure S-11.** Comparison of the experimental IRMPD spectrum (blue silhouette) with the harmonic calculated normal mode (solid red line, scaled by 0.97 with  $30\text{ cm}^{-1}$  Gaussian line broadening)<sup>a</sup> of a ring-opened isomer of **11** which, gives a poor match to the experimental spectrum.

**Figure S-12.** Comparison of the experimental IRMPD spectrum (blue silhouette) with the harmonic calculated normal modes (solid red line, scaled by 0.97 with  $30\text{ cm}^{-1}$  Gaussian line broadening)<sup>a</sup> of a ring-opened isomer of **11**, which does not match the experimental spectrum.

**Figure S-13.** Experimental IRMPD (blue silhouette) vs. harmonic calculated normal mode (solid red line, scaled by 0.97 with  $30\text{ cm}^{-1}$  Gaussian line broadening)<sup>a</sup> of **12** without the scrambling of the protons in the NBN branch of the cyclic isomer (top) and a branched isomer (bottom) which was found to be more stable than the cyclic isomers but gives a poor match to the experimental spectrum.

**Figure S-14.** Comparison of the experimental IRMPD spectrum (blue silhouette) with harmonic calculated modes of **12** (solid red line, scaled by 0.97 with  $30\text{ cm}^{-1}$  Gaussian line broadening)<sup>a</sup> when scrambling of the protons in the NBN branch takes place, which shows a poor match to the experimental spectrum.

**Figure S-15.** Comparison of the experimental IRMPD spectrum (blue silhouette) with the harmonic calculated normal mode (solid red line, scaled by 0.97 with  $30\text{ cm}^{-1}$  Gaussian line broadening)<sup>a</sup> of a ring-opened isomer of **12**, which gives a poor match to the experimental spectrum.

**Figure S-16.** Comparison of the experimental IRMPD (blue silhouette) of the  $m/z$  57 daughter ion of **5** (solid red lines, scaled by 0.97 with  $30\text{ cm}^{-1}$  Gaussian line broadening)<sup>a</sup> after a loss of  $\text{H}_2$  and propene. The daughter ion in which the charge of the molecule is in the inner nitrogen (top panel) shows a better fit to the experimental spectrum than does the daughter ion in which the charge is in the outer nitrogen (bottom panel).

**Figure S-17.** Comparison of the experimental IRMPD (blue silhouette) with the harmonic calculated normal modes (solid red lines, scaled by 0.97 with  $30\text{ cm}^{-1}$  Gaussian line broadening)<sup>a</sup> of a branched isomer of **6**. The branched isomer was found to be more stable than the cyclic isomer, however, the comparison of

**Figure S-18.** Comparison of the experimental IRMPD spectrum (blue silhouette) with the harmonic calculated normal modes (red solid line, scaled by 0.97 with  $30\text{ cm}^{-1}$  Gaussian line broadening)<sup>a</sup> of a branched isomer of **16**, in which the charge of the molecule is on the exocyclic nitrogen, which gives a worse match to the experimental spectrum than does the structure in Chart 2.

**Figure S-19.** Comparison of the experimental IRMPD spectrum (blue silhouette) with the harmonic calculated normal modes (red solid line, scaled by 0.97 with  $30\text{ cm}^{-1}$  Gaussian line broadening)<sup>a</sup> of another branched isomer of **16**, in which the charge of the molecule is on the endocyclic nitrogen, which also gives a poor match to the experimental spectrum.

<sup>a</sup> Gaussian 03, Revision C.02, Frisch, M.J.; Trucks, G.W.; Schlegel, H.B.; Scuseria, G.E.; Robb, M.A.; Cheeseman, J.R.; Montgomery, Jr., J.A.; Vreven, T.; Kudin, K.N.; Burant, J.C.; Millam, J.M.; Iyengar, S.S.; Tomasi, J.; Barone, V.; Mennucci, B.; Cossi, M.; Scalmani, G.; Rega, N.; Petersson, G.A.; Nakatsuji, H.; Hada, M.; Ehara, M.; Toyota, K.; Fukuda, R.; Hasegawa, J.; Ishida, M.; Nakajima, T.; Honda, Y.; Kitao, O.; Nakai, H.; Klene, M.; Li, X.; Knox, J. E.; Hratchian, H.P.; Cross, J.B.; Bakken, V.; Adamo, C.; Jaramillo, J.; Gomperts, R.; Stratmann, R.E.; Yazyev, O.; Austin, A.J.; Cammi, R.; Pomelli, C.; Ochterski, J.W.; Ayala, P. Y.; Morokuma, K.; Voth, G.A.; Salvador, P.; Dannenberg, J.J.; Zakrzewski, V.G.; Dapprich, S.; Daniels, A. D.; Strain, M.C.; Farkas, O.; Malick, D.K.; Rabuck, A.D.; Raghavachari, K.; Foresman, J.B.; Ortiz, J.V.; Cui, Q.; Baboul, A.G.; Clifford, S.; Cioslowski, J.; Stefanov, B.B.; Liu, G.; Liashenko, A.; Piskorz, P.; Komaromi, I.; Martin, R.L.; Fox, D.J.; Keith, T.; Al-Laham, M.A.; Peng, C.Y.; Nanayakkara, A.; Challacombe, M.; Gill, P.M.W.; Johnson, B.; Chen, W.; Wong, M.W.; Gonzalez, C.; Pople, J.A.; Gaussian, Inc., Wallingford CT, 2004.

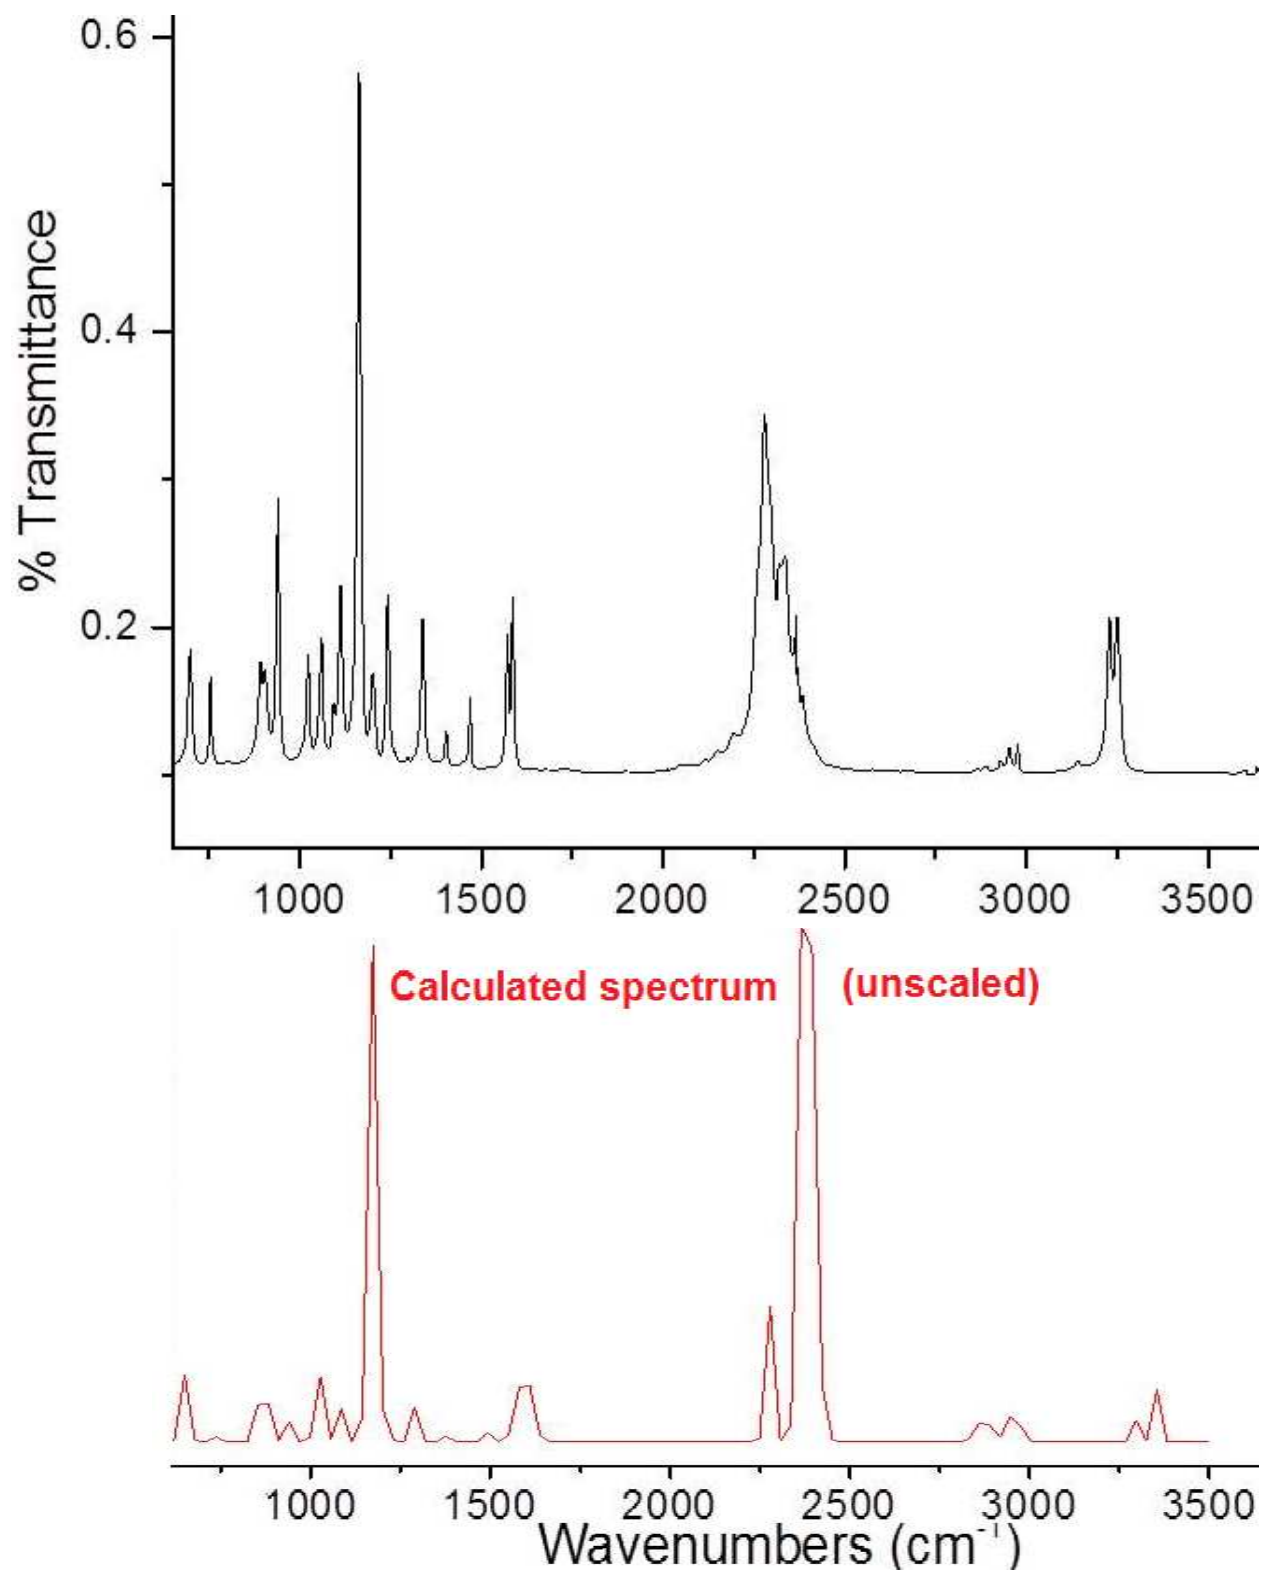

**Figure S-1.** Comparison of the IR absorption spectrum recorded for solid **4** ( $n=1$ ) (upper panel) compared with the absorptions predicted by an anharmonic frequency calculation on the isolated molecule (lower panel) at B3LYP/aug-cc-pVTZ (using harmonic intensities with unscaled anharmonic frequencies).

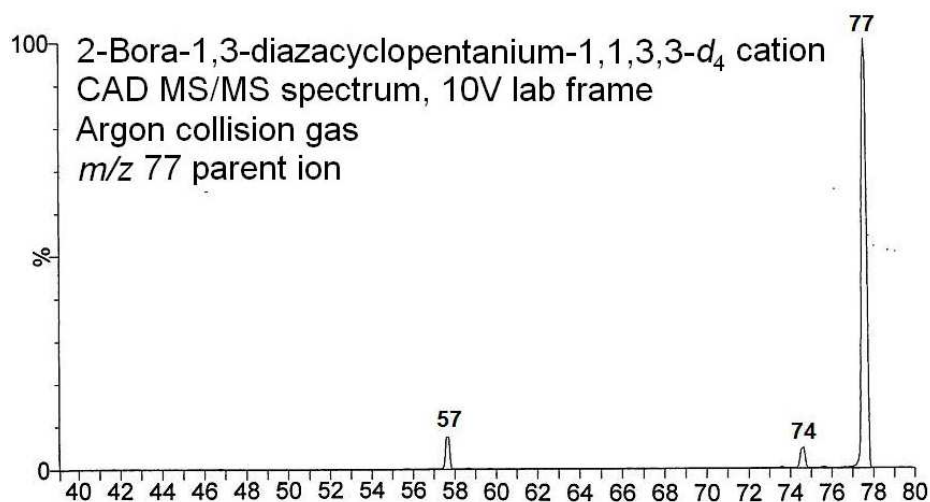

**Figure S-2.** Collisionally Activated Dissociation (CAD) MS/MS spectrum of tetradeuterated ion **9** at 10V lab frame energy. The parent ion,  $m/z$  77, gives  $m/z$  74 (loss of HD) and  $m/z$  57 (loss of  $ND_3$ ).

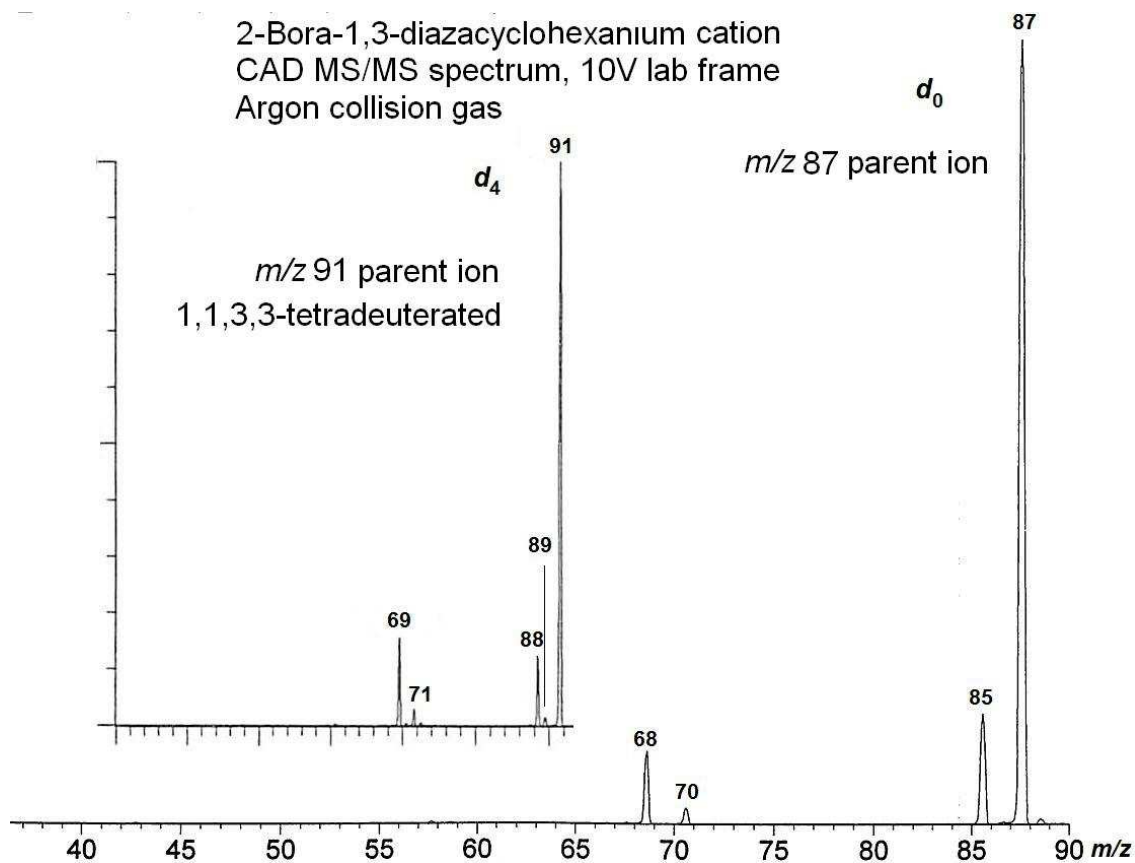

**Figure S-3.** CAD MS/MS spectra of ion **4** at 10V lab frame energy, which shows the parent ion at  $m/z$  87 and produces ions at  $m/z$  85 (loss of  $H_2$ ),  $m/z$  70 (loss of ammonia), and  $m/z$  68 (loss of  $H_2$  and ammonia). Inset, a CAD of ion **10** at 10V, which shows a parent ion at  $m/z$  91 and daughter ions  $m/z$  89 (loss of HD), a much smaller  $m/z$  88 (loss of  $H_2$ ),  $m/z$  71 (loss of  $ND_3$ ), and  $m/z$  69 (loss of  $H_2$  and  $ND_3$  or of HD and  $NHD_2$ ).

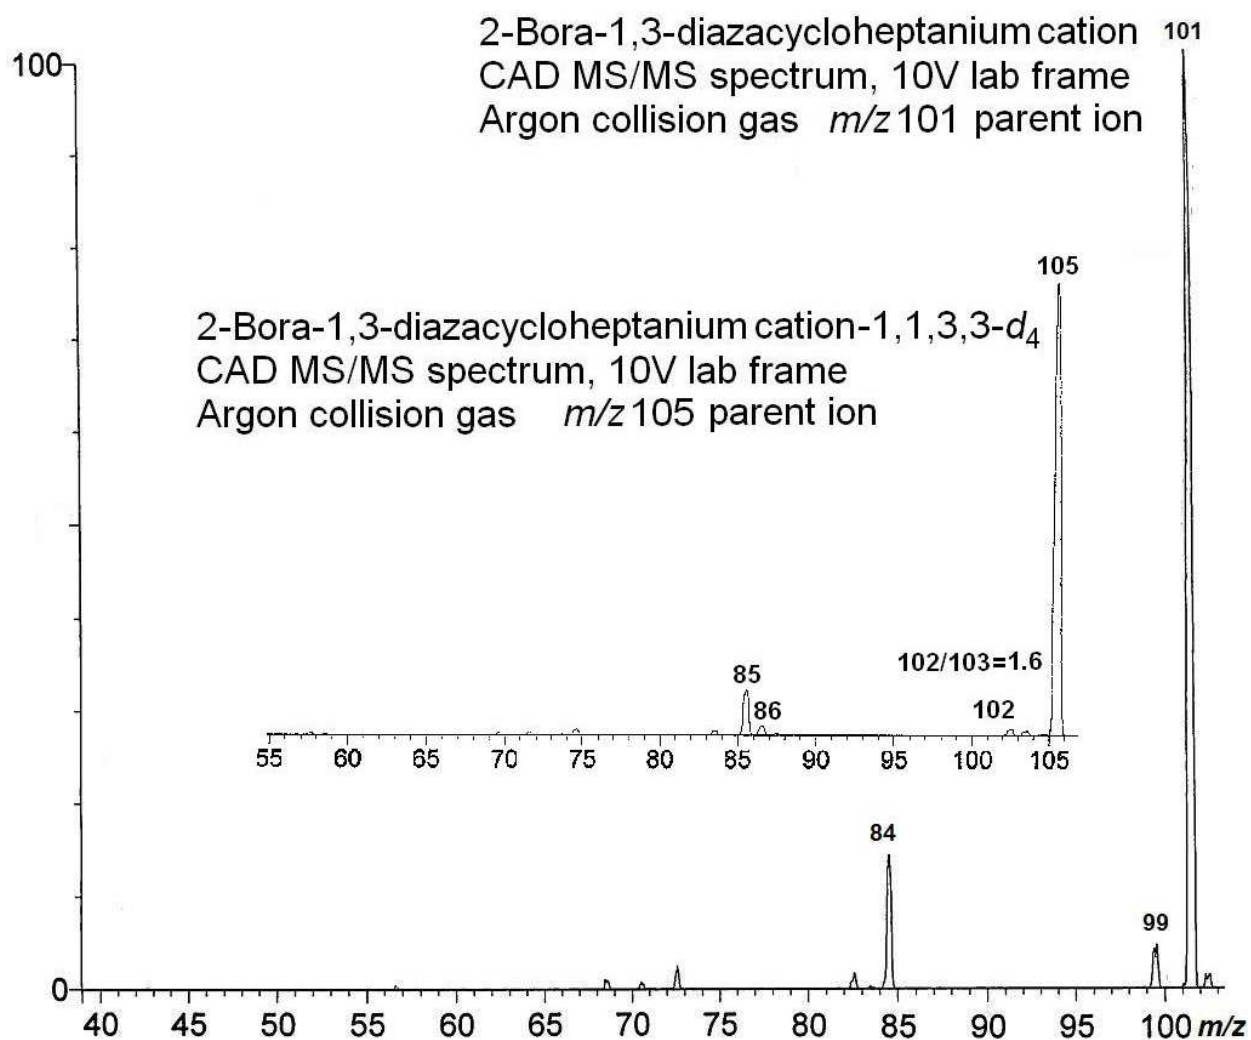

**Figure S-4.** CAD MS/MS spectra of ion **5** at 10V lab frame energy which shows the parent ion  $m/z$  101 which produces  $m/z$  99 (loss of  $H_2$ ) and  $m/z$  84 (loss of ammonia). Inset, a CAD of ion **11** at 10V, which shows a parent ion at  $m/z$  105 and daughter ions  $m/z$  102 (loss of HD) and  $m/z$  103 (loss of  $H_2$ ),  $m/z$  85 (loss of  $ND_3$ ), and  $m/z$  86 (loss of  $NHD_2$ ).

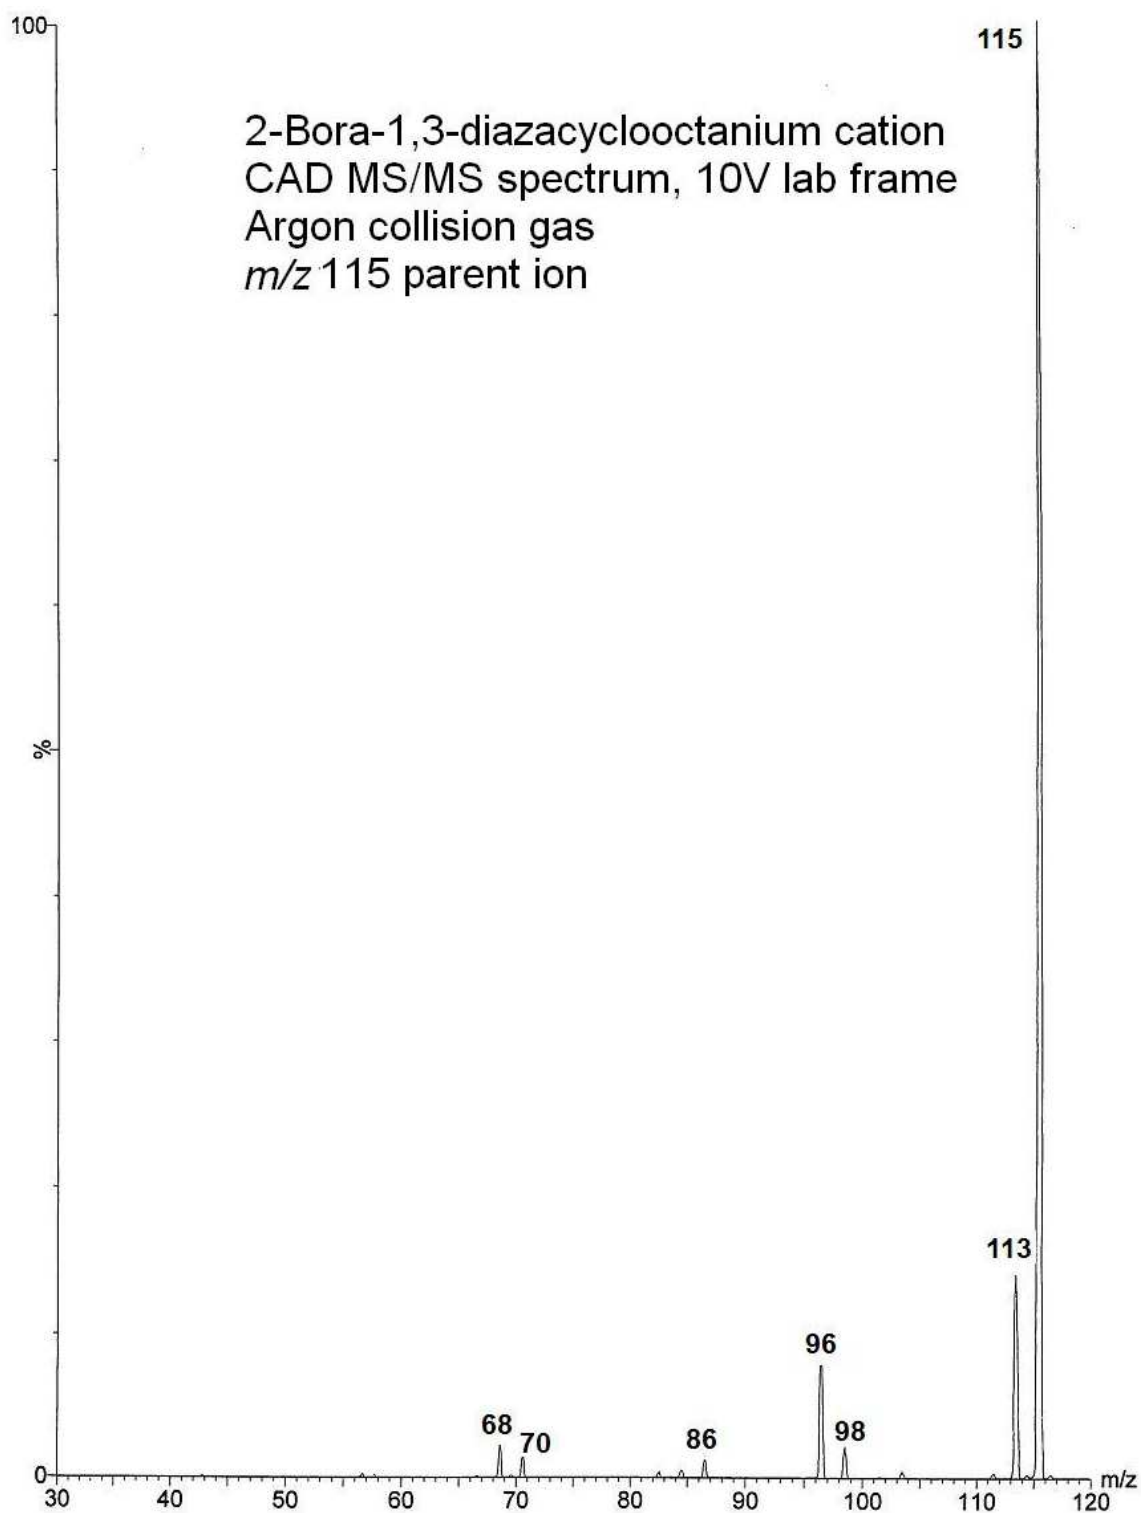

**Figure S-5.** CAD MS/MS spectra of ion **6** at 10 V lab frame energy which shows the parent ion  $m/z$  115 and daughter ions  $m/z$  113 (loss of  $H_2$ ),  $m/z$  98 (loss of ammonia),  $m/z$  96 (loss of  $H_2$  and ammonia), and other daughter ions.

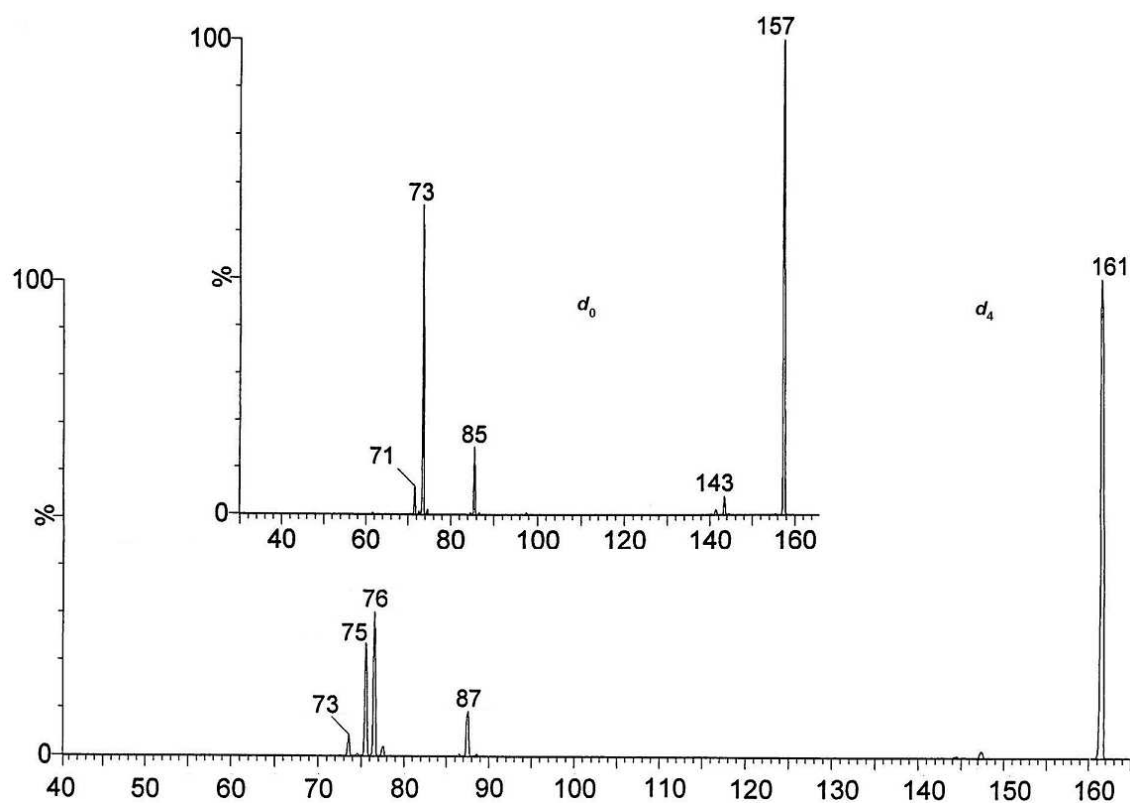

**Figure S-6.** CAD MS/MS spectra of ion **17** ( $m/z$  157) and its  $d_4$  analogue ( $m/z$  161 from exchange with EtOD solvent) at 10V lab frame energy with argon collision gas.

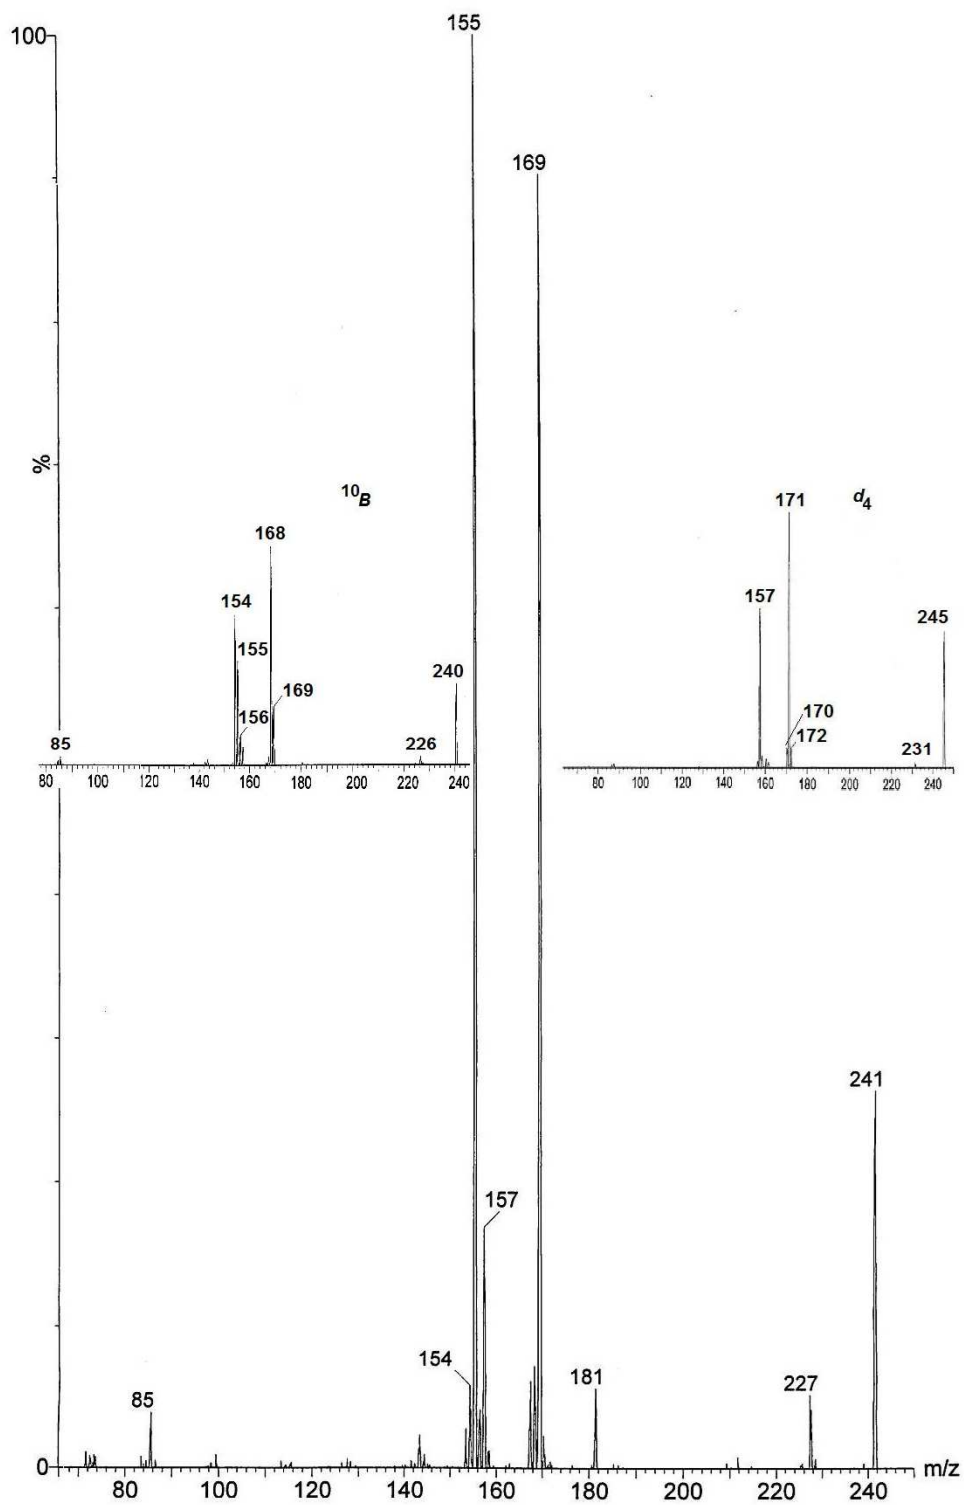

**Figure S-7.** CAD spectra of ion **18** and its isotopomers (left inset a  $^{10}\text{B}$  & two  $^{11}\text{B}$ s at natural abundance; right inset the  $d_4$  analogue from exchange in EtOD) at 10V lab frame energy with argon collision gas.



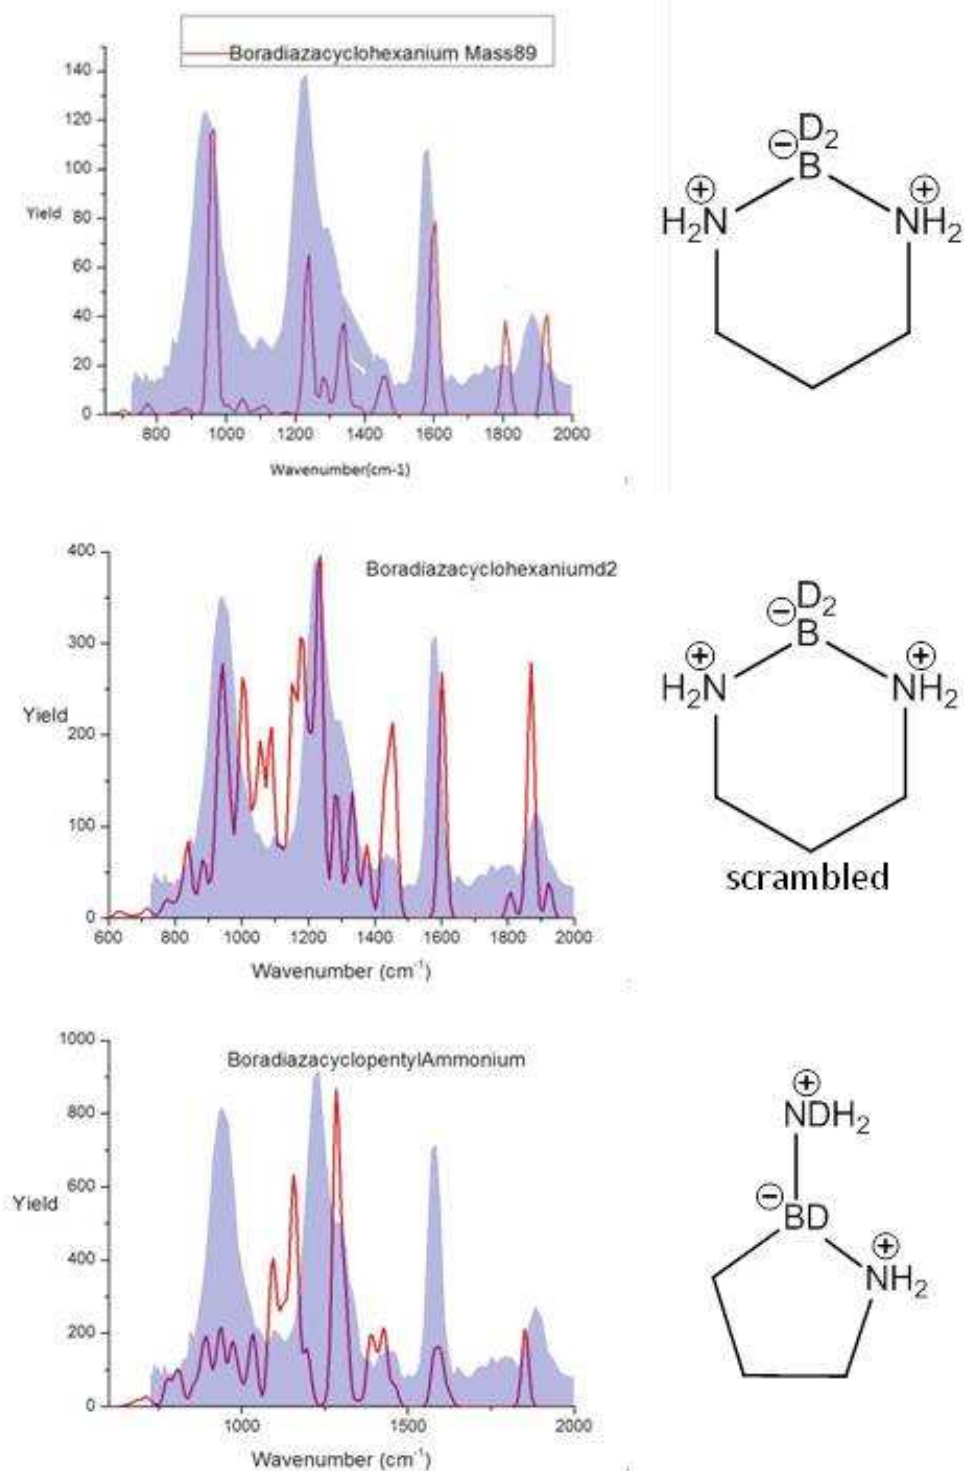

**Figure S-8.** Experimental IRMPD spectra (blue silhouette) vs. harmonic calculated normal modes (solid red line, scaled by 0.97 with 30 cm<sup>-1</sup> gaussian line broadening)<sup>a</sup> of **7**: without scrambling of the protons in the NBN branch (top) and shows a good fit except for a mismatch of peaks in the 1750 to 1950 cm<sup>-1</sup> region; with scrambling of the protons in the NBN branch (middle) which shows a matching peak in the 1750 to 1950 cm<sup>-1</sup> region but a poor fit for the rest; and a branched isomer (bottom) which was found to be more stable than the two cyclic isomers on top but shows a poor fit to the experimental peaks.

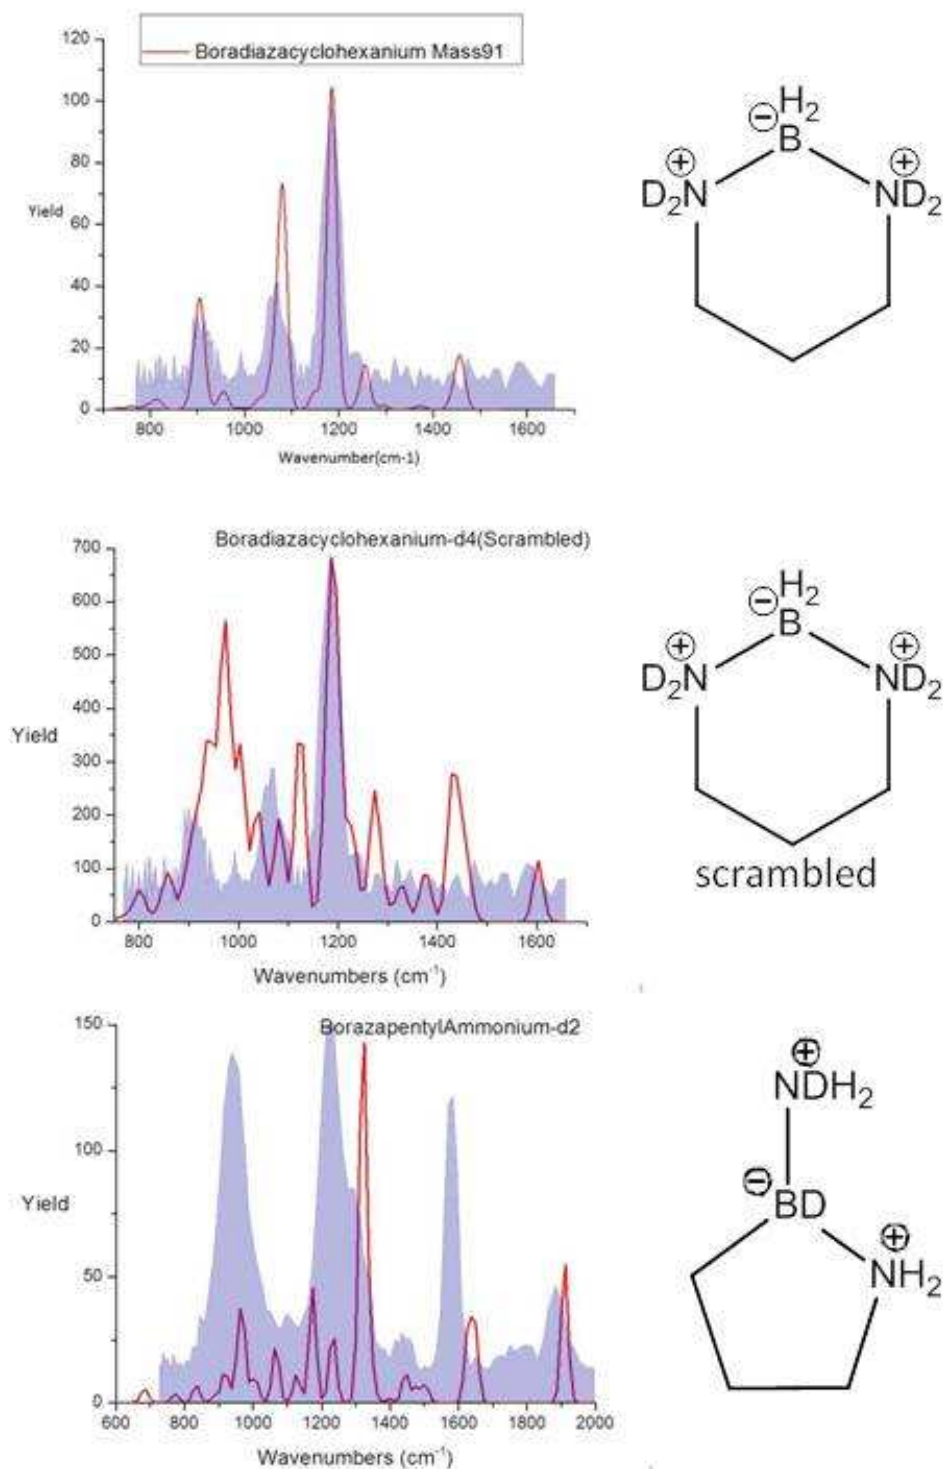

**Figure S-9.** Experimental IRMPD spectrum (blue silhouette) vs. harmonic calculated normal mode (solid red line, scaled by 0.97 with  $30 \text{ cm}^{-1}$  gaussian line broadening)<sup>a</sup> of **10**: without scrambling of the protons in the NBN branch (top), which shows a good fit to experimental band positions; with scrambling of the protons in the NBN branch (middle) which shows a poor fit compared to the unscrambled isomer; and a branched isomer (bottom) which was found to be more stable than the two cyclic isomers on top but also shows a poor fit to the experimental bands.

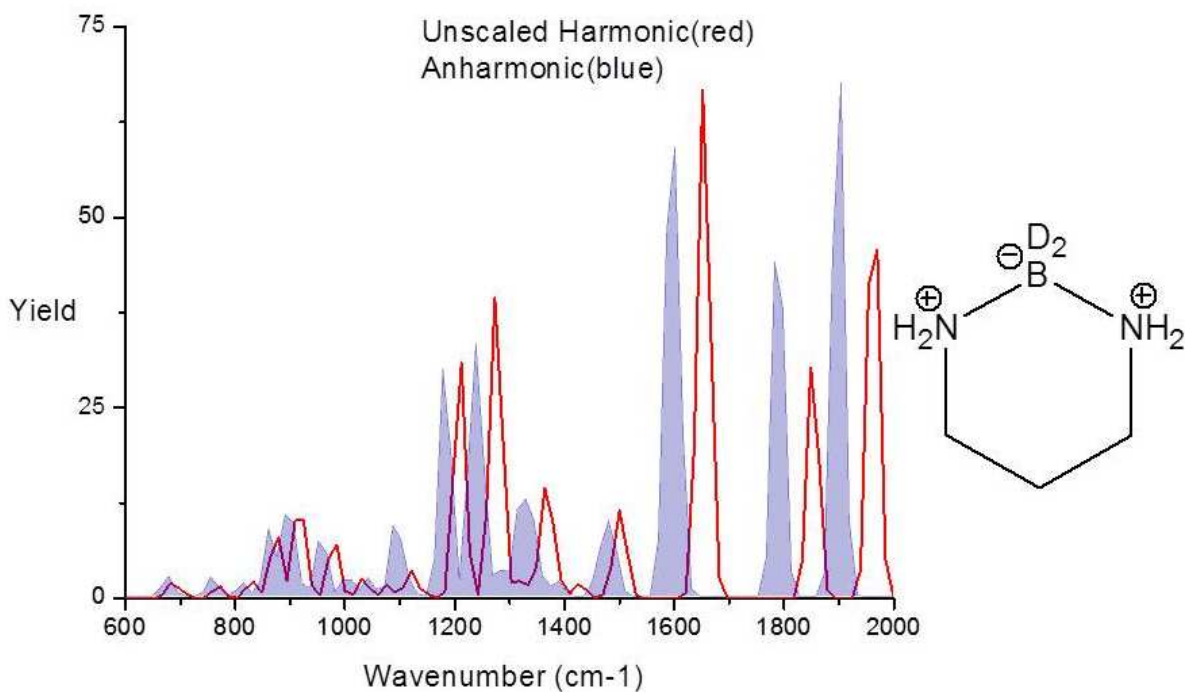

**Figure S-10.** A comparison of harmonic normal modes (solid red line, unscaled with 30 cm<sup>-1</sup> gaussian line broadening) and anharmonic vibrations (blue silhouette, unscaled using harmonic intensities and 30 cm<sup>-1</sup> gaussian line broadening)<sup>a</sup> calculated for **7**, which shows the same peak positions below 800 cm<sup>-1</sup> with a shift of about 3% in the wavenumbers above 800 cm<sup>-1</sup>.

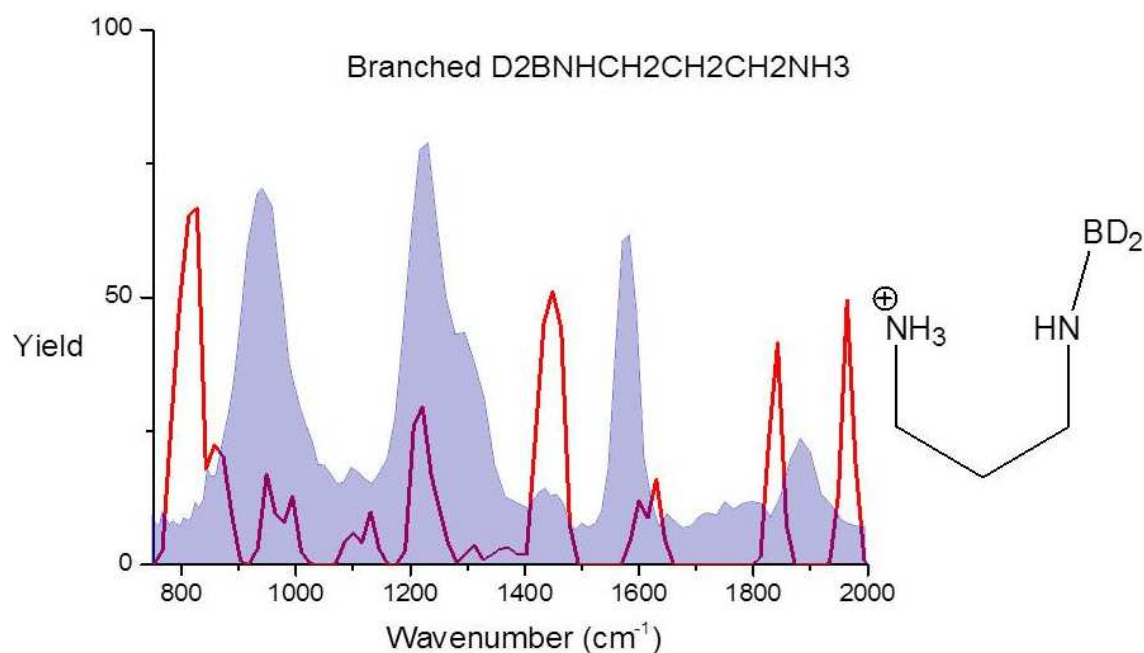

**Figure S-11.** Comparison of the experimental IRMPD spectrum (blue silhouette) with the harmonic calculated normal mode (solid red line, scaled by 0.97 with 30 cm<sup>-1</sup> gaussian line broadening)<sup>a</sup> of a ring-opened isomer of **7** which, gives a poor match to the experimental spectrum.

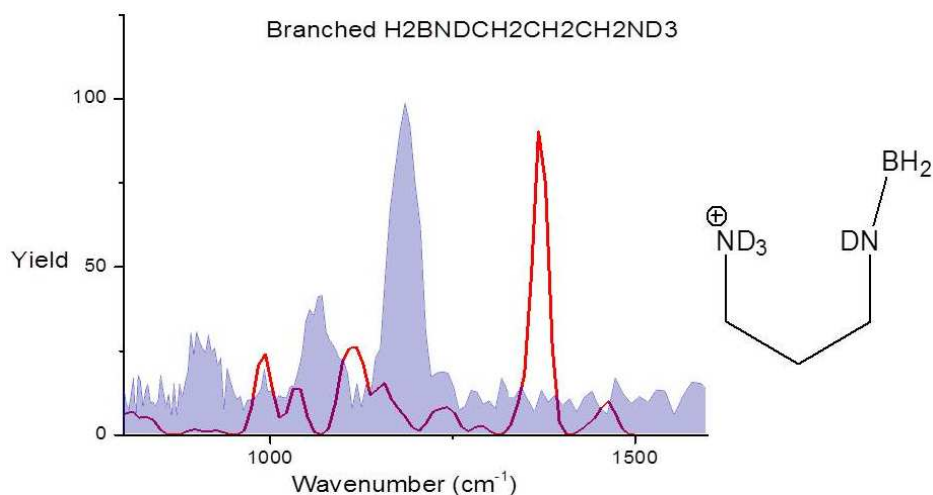

**Figure S-12.** Comparison of the experimental IRMPD spectrum (blue silhouette) with the harmonic calculated normal modes (solid red line, scaled by 0.97 with 30 cm<sup>-1</sup> gaussian line broadening)<sup>a</sup> of a ring-opened isomer of **10**, which does not match the experimental spectrum.

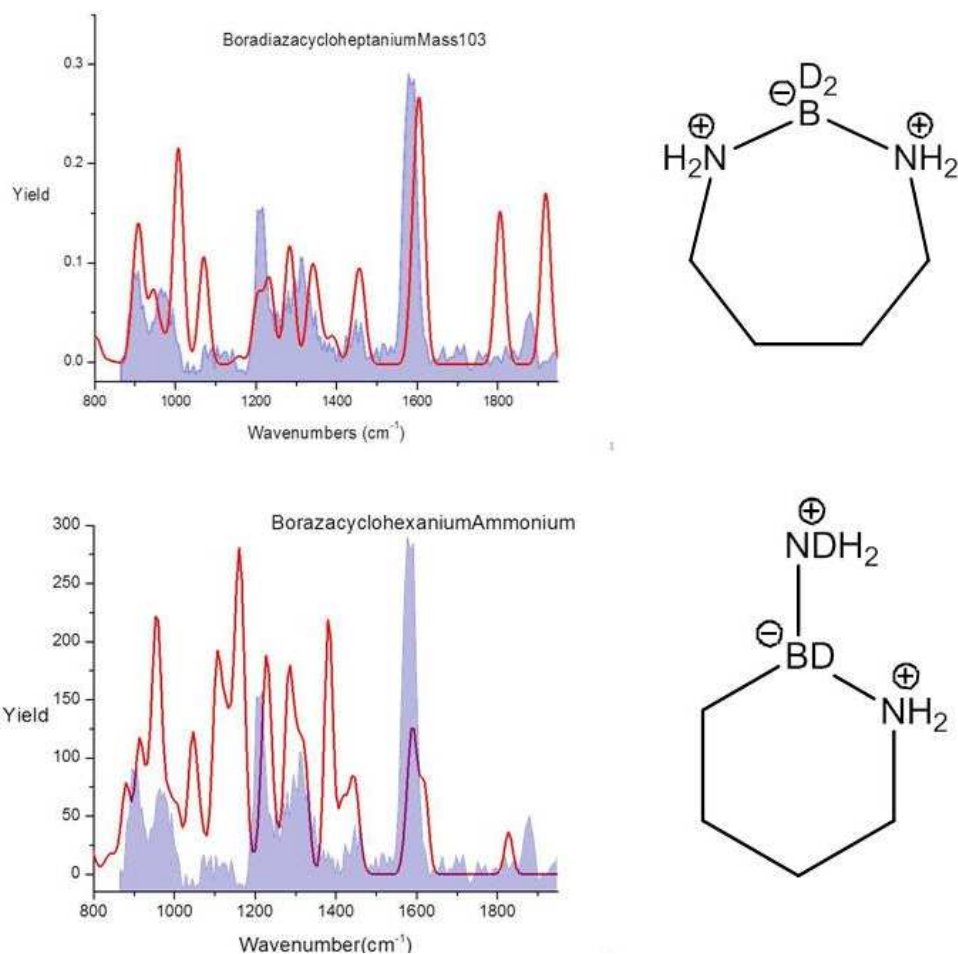

**Figure S-13.** Experimental IRMPD (blue silhouette) vs. harmonic calculated normal mode (solid red line, scaled by 0.97 with 30 cm<sup>-1</sup> gaussian line broadening)<sup>a</sup> of **8** without the scrambling of the protons in the NBN branch of the cyclic isomer (top) and a branched isomer (bottom) which was found to be more stable than the cyclic isomers but gives a poor match to the experimental spectrum.

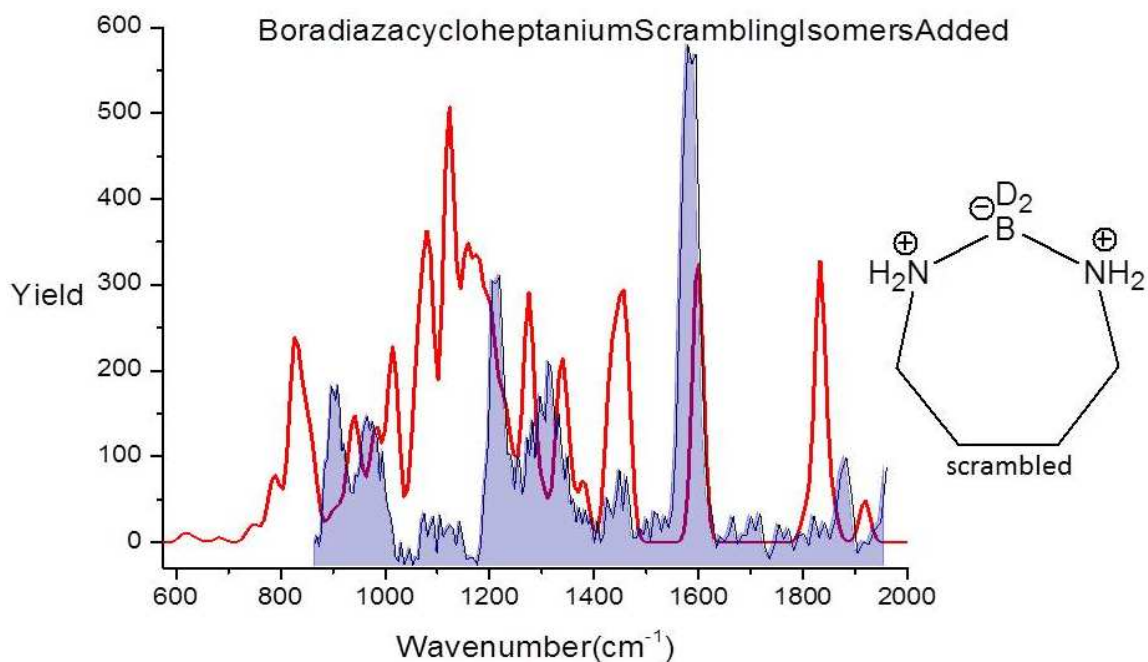

**Figure S-14.** Comparison of the experimental IRMPD spectrum (blue silhouette) with harmonic calculated modes of **8** (solid red line, scaled by 0.97 with 30  $\text{cm}^{-1}$  gaussian line broadening)<sup>a</sup> when scrambling of the protons in the NBN branch takes place, which shows a poor match to the experimental spectrum.

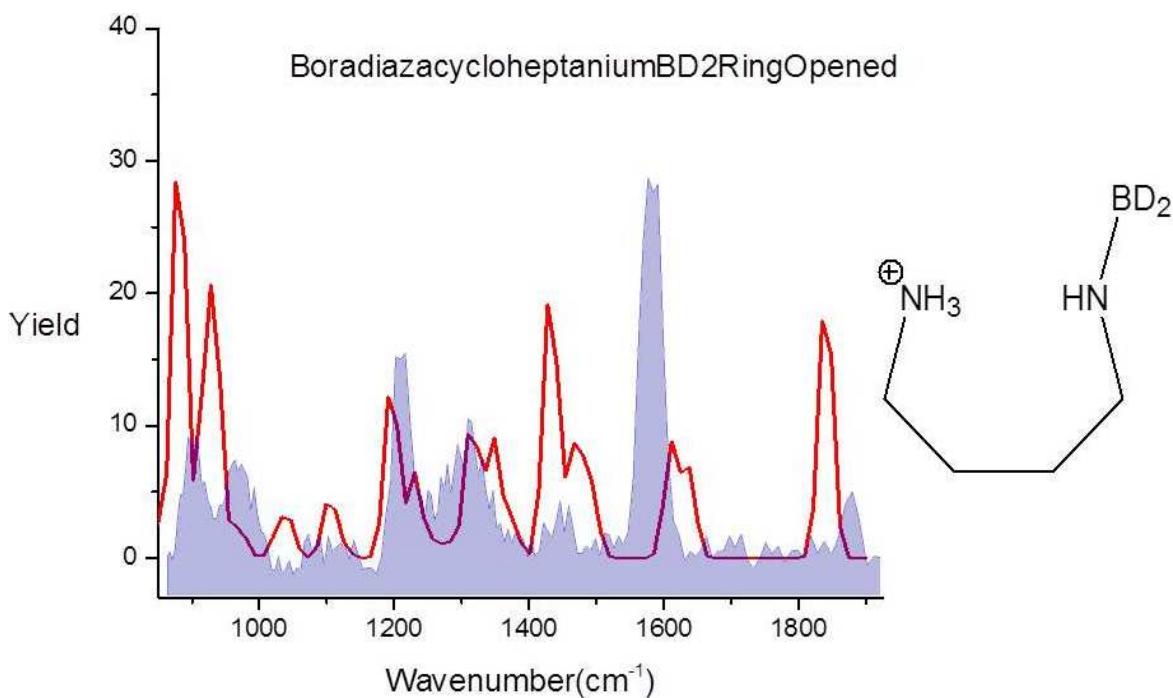

**Figure S-15.** Comparison of the experimental IRMPD spectrum (blue silhouette) with the harmonic calculated normal mode (solid red line, scaled by 0.97 with 30  $\text{cm}^{-1}$  gaussian line broadening)<sup>a</sup> of a ring-opened isomer of **8**, which gives a poor match to the experimental spectrum.

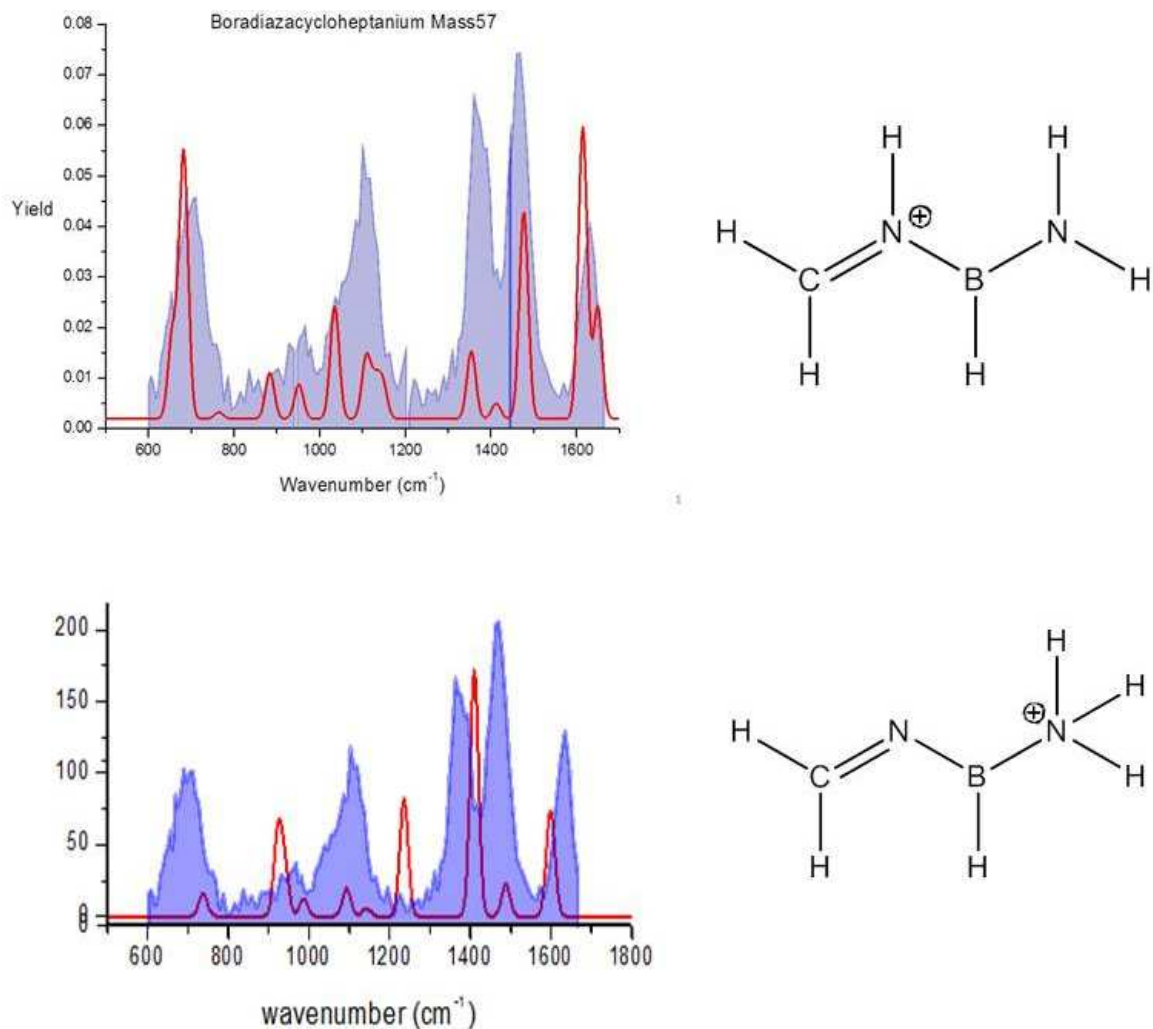

**Figure S-16.** Comparison of the experimental IRMPD (blue silhouette) of the  $m/z$  57 daughter ion of **5** (solid red lines, scaled by 0.97 with  $30\text{ cm}^{-1}$  gaussian line broadening)<sup>a</sup> after a loss of  $\text{H}_2$  and propene. The daughter ion in which the charge of the molecule is in the inner nitrogen (top panel) shows a better fit to the experimental spectrum than does the daughter ion in which the charge is in the outer nitrogen (bottom panel).



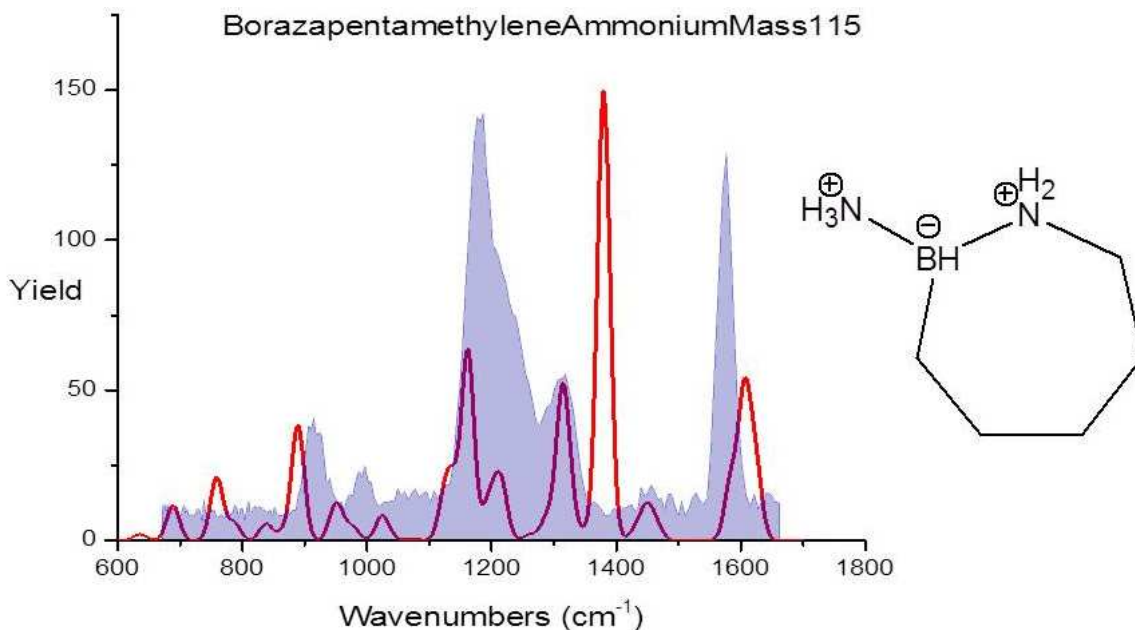

**Figure S-17.** Comparison of the experimental IRMPD (blue silhouette) with the harmonic calculated normal modes (solid red lines, scaled by 0.97 with  $30\text{ cm}^{-1}$  gaussian line broadening)<sup>a</sup> of a branched isomer of **6**. This branched isomer was found by calculation to be more stable than the cyclic isomer **6**; however, the comparison of the experimental spectrum with that calculated at the bottom of Figure 1 shows **6** to be the structure.

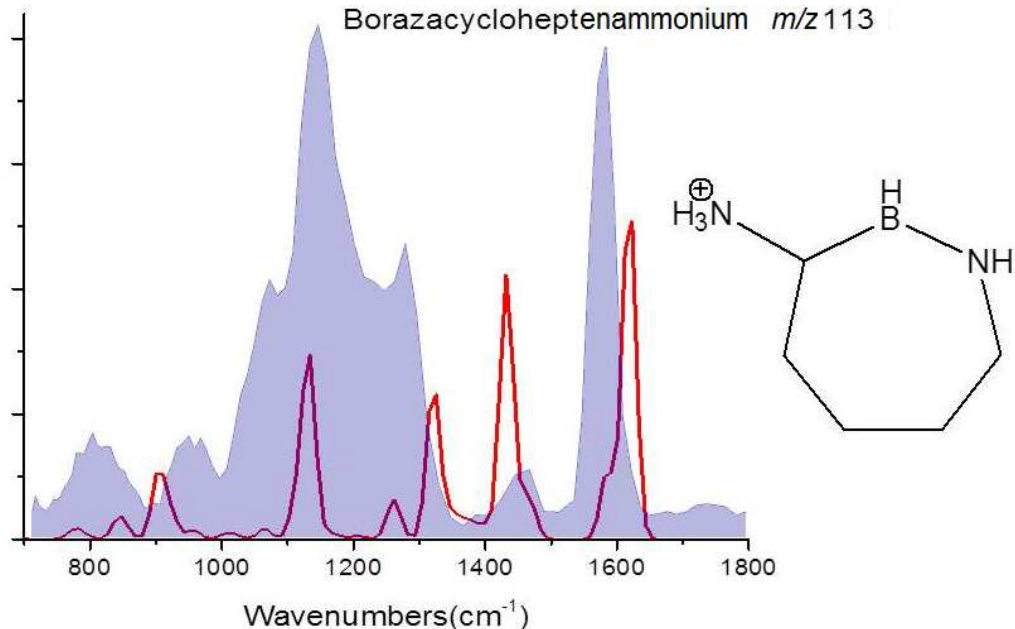

**Figure S-18.** Comparison of the experimental IRMPD spectrum (blue silhouette) with the harmonic calculated normal modes (red solid line, scaled by 0.97 with  $30\text{ cm}^{-1}$  gaussian line broadening)<sup>a</sup> of a branched isomer of **16**, in which the charge of the molecule is on the exocyclic nitrogen, which gives a worse match to the experimental spectrum than does the structure in Chart 2.

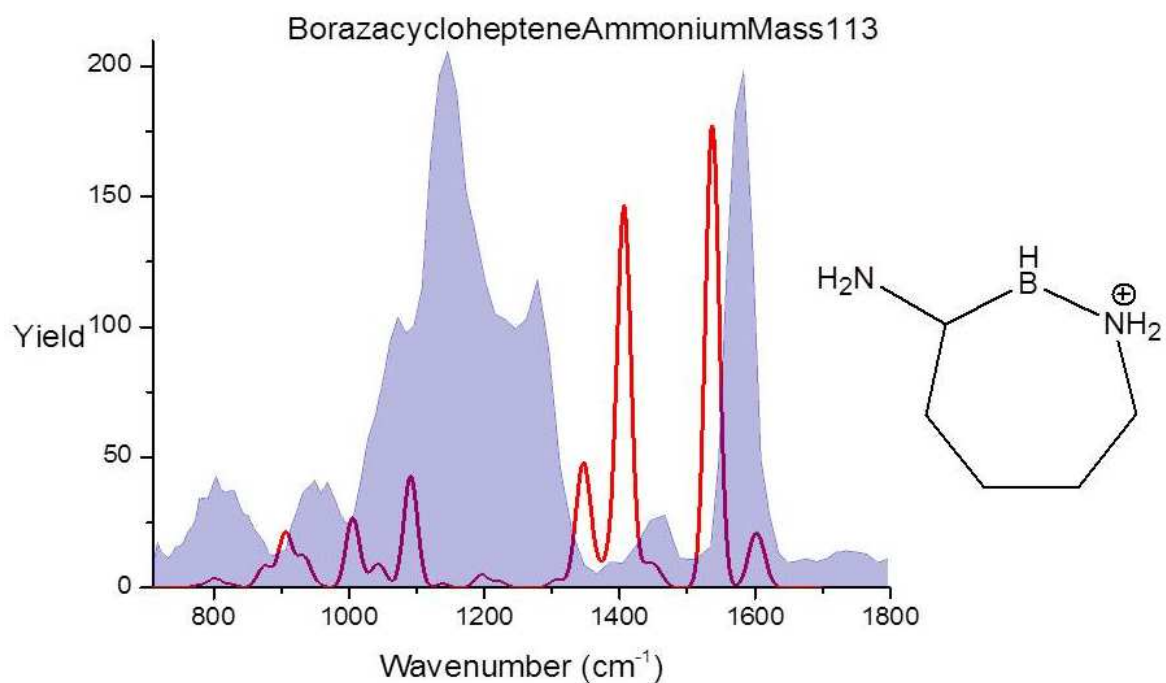

**Figure S-19.** Comparison of the experimental IRMPD spectrum (blue silhouette) with the harmonic calculated normal modes (red solid line, scaled by 0.97 with 30 cm<sup>-1</sup> gaussian line broadening)<sup>a</sup> of another branched isomer of **16**, in which the charge of the molecule is on the endocyclic nitrogen, which also gives a poor match to the experimental spectrum.
